# Supplementary material for: Exposure to dim light at night alters daily rhythms of glucose and lipid metabolism in rats
Source: PubMed Central journal article supplement (PMC9465160; doi:10.3389/fphys.2022.973461), 2022-08-29
Supplement: Image1.pdf [file Image1.pdf]

## Supplementary Material

### Supplementary Figures

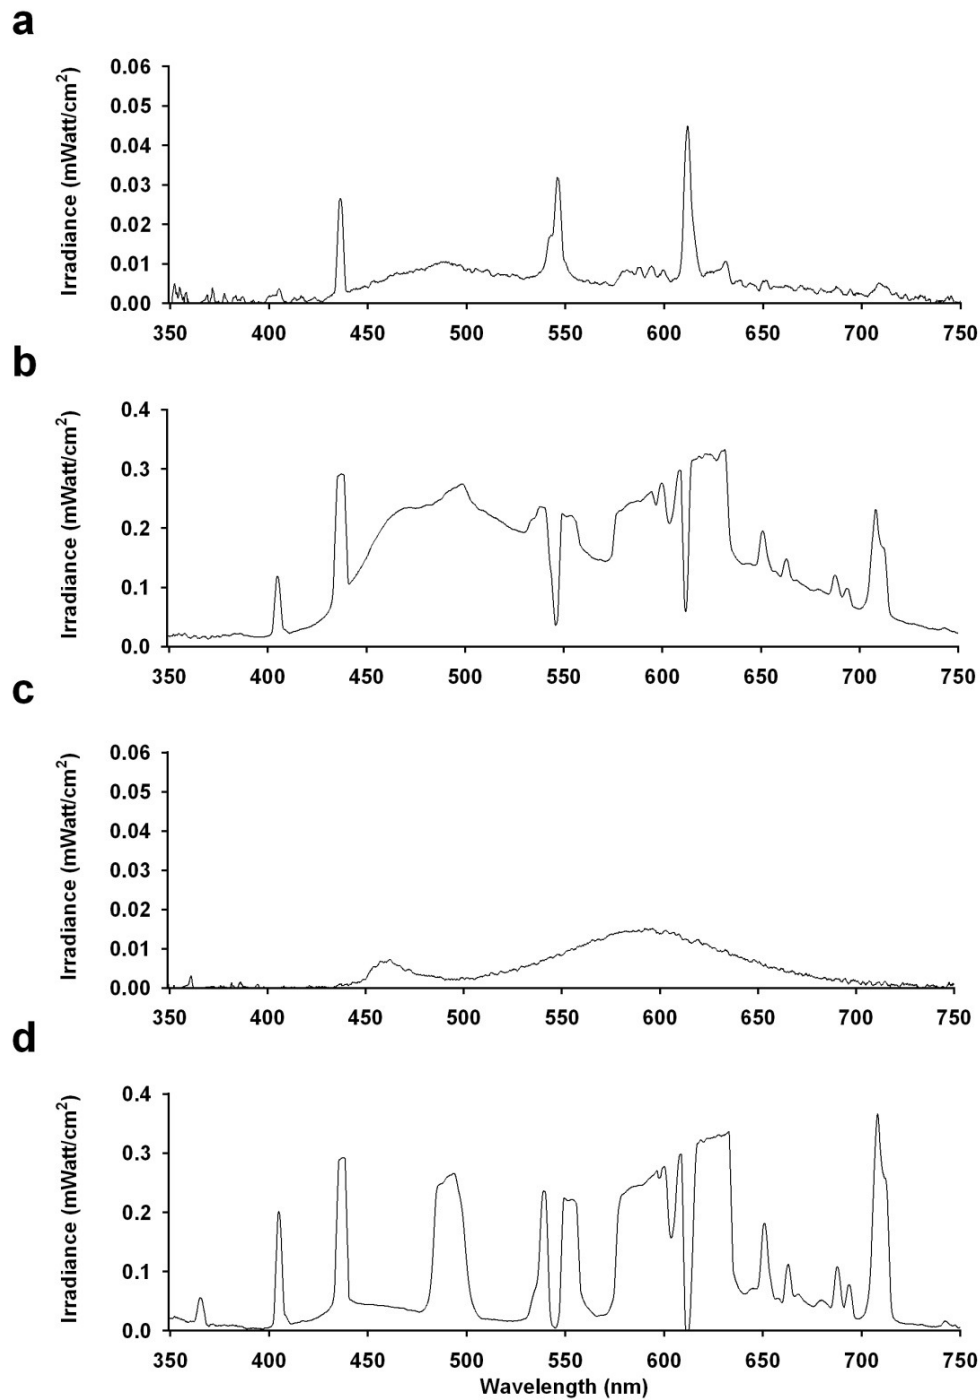

**Figure S1. Spectral power distributions of light sources used in Experiment 1.** Dim light (5 lux) emitted by white LED lights (**c**) and bright light (150-200 lux) (**d**) emitted by white fluorescent tubes for Experiment 1. Note the 10-fold difference in y-axis units between dim and bright light. Spectral

power distributions were measured with an AvaSpec 2048-SPU (Avantus BV, the Netherlands) light meter. The figure is an abstract from the figure in Stenvers et al., 2016 published in Scientific Reports by Nature Portfolio (Stenvers et al., 2016).

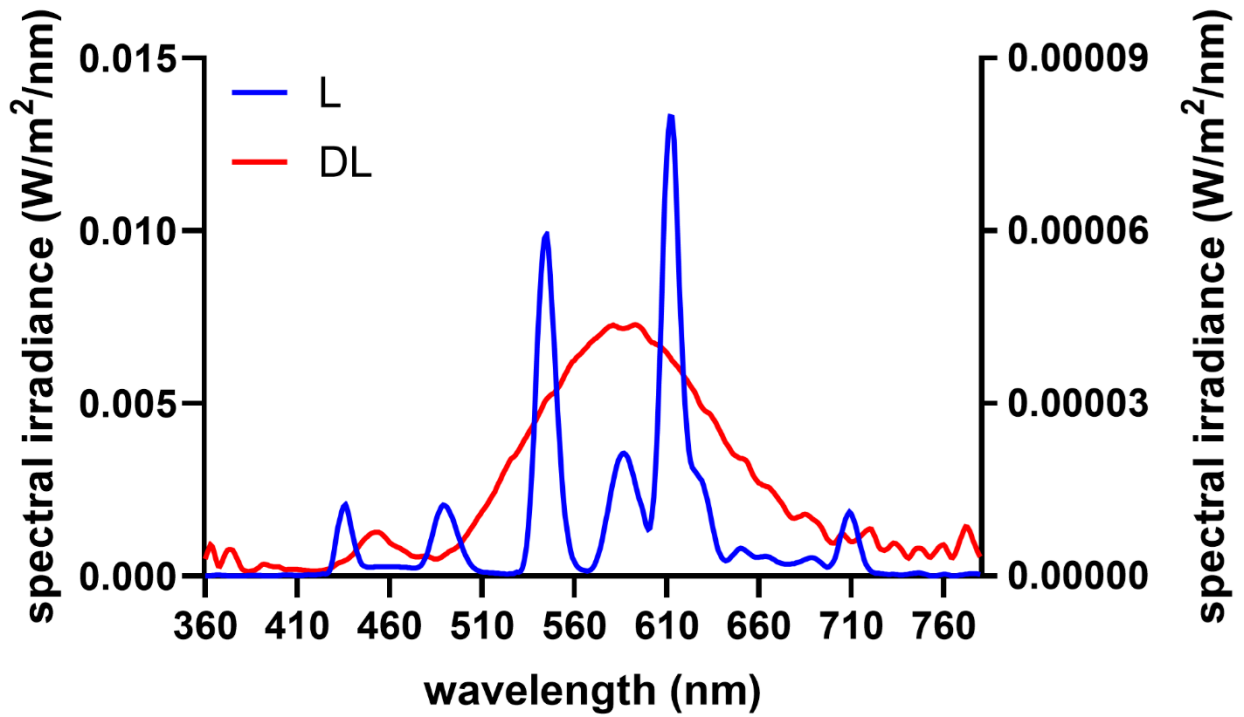

**Figure S2. Spectral power distributions of light sources used in Experiment 2.** Bright white light (150–200 lx, L) used during the light phase (blue, left y axis) and dim light (~2 lx, DL) during the night phase (red, right y axis). Spectral power distribution was measured with an illuminance spectrophotometer CL-500A (Konica Minolta Sensing Europe BV, Germany)

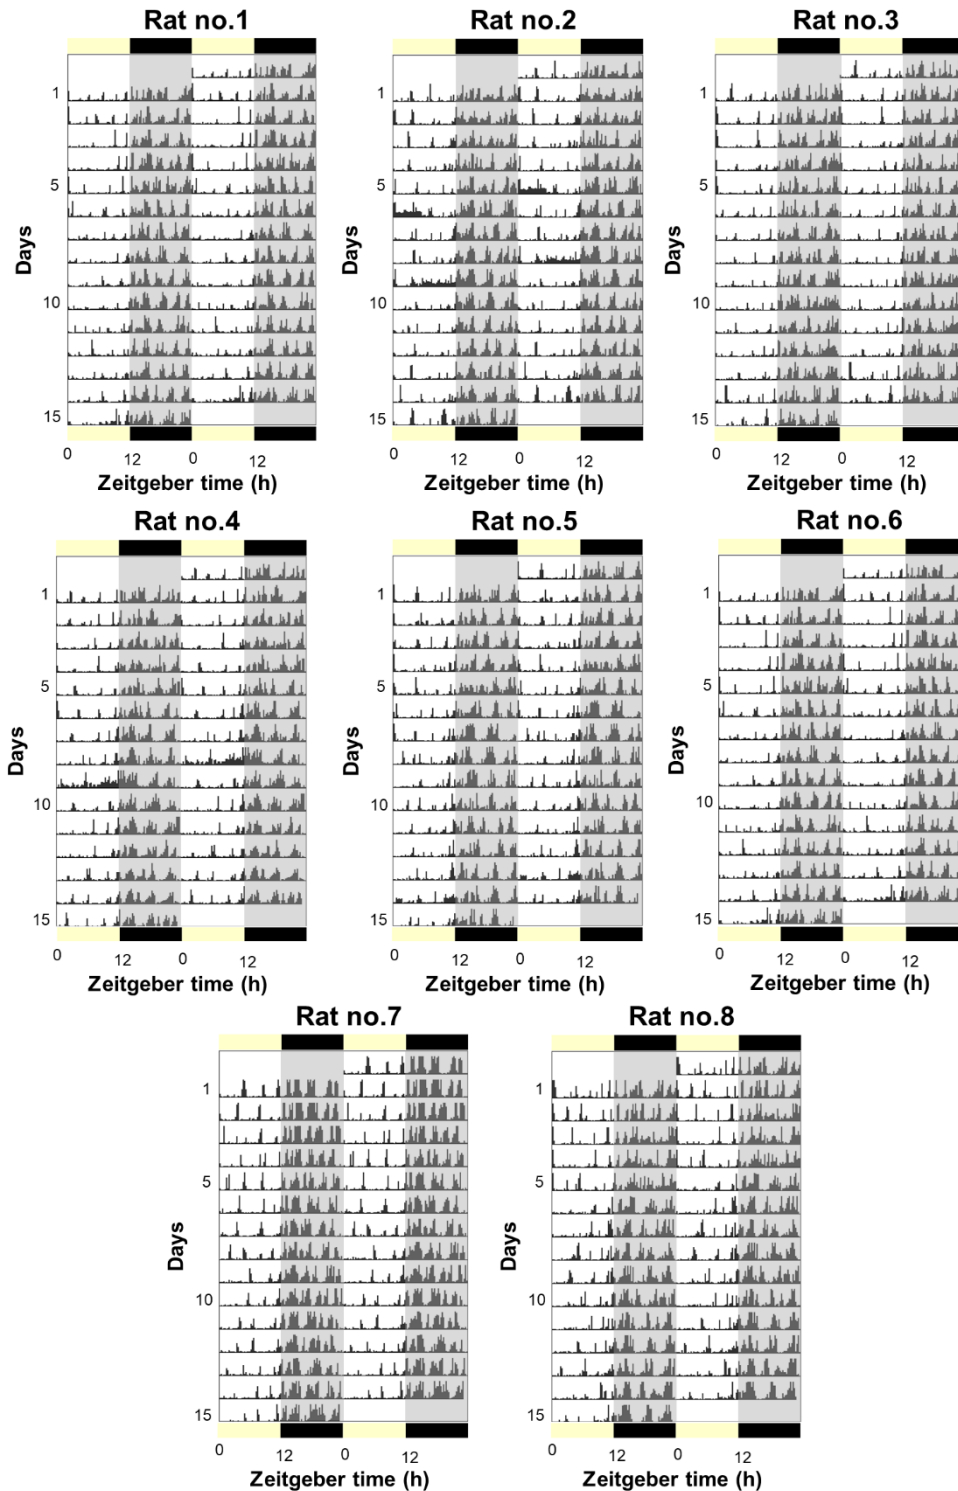

**Figure S3. Actograms of control (CTRL) rats kept in the standard LD regime for 3 weeks (Experiment 1).** Five days per week are shown in the actogram: baseline week – day 1 to 5, week 1 – day 6 to 10, week 2 – day 11 to 15. Each week, two days were skipped because of the weekly cleaning of the cages. Horizontal bars at the top and bottom of actograms indicate light (light yellow) and dark phase (black).

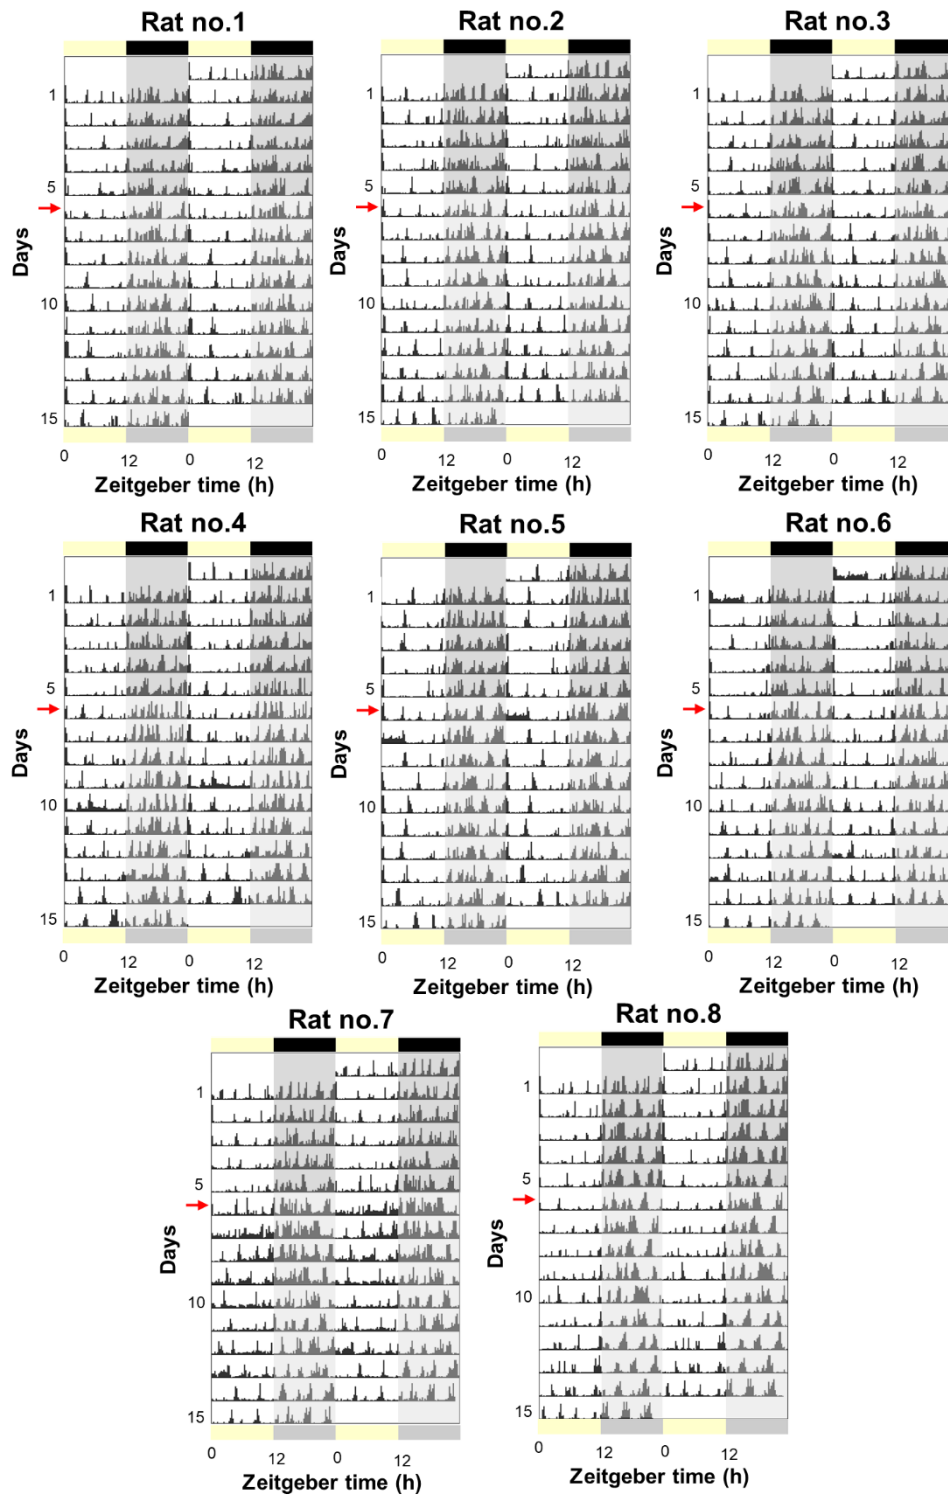

**Figure S4. Actograms of rats exposed to dim light at night (ALAN) for 2 weeks (Experiment 1).** During the baseline weeks animals were kept in the standard LD regime and after, animals were exposed to dim light at night (the change in light regimes is indicated by red arrow). Five days per week are shown in the actogram: baseline week – day 1 to 5, week 1 – day 6 to 10, week 2 – day 11 to 15. Each week, two days were skipped because of the weekly cleaning of the cages. Horizontal bars at the top and bottom of actograms indicate light (light yellow), dark (black) and dim light phase (grey).



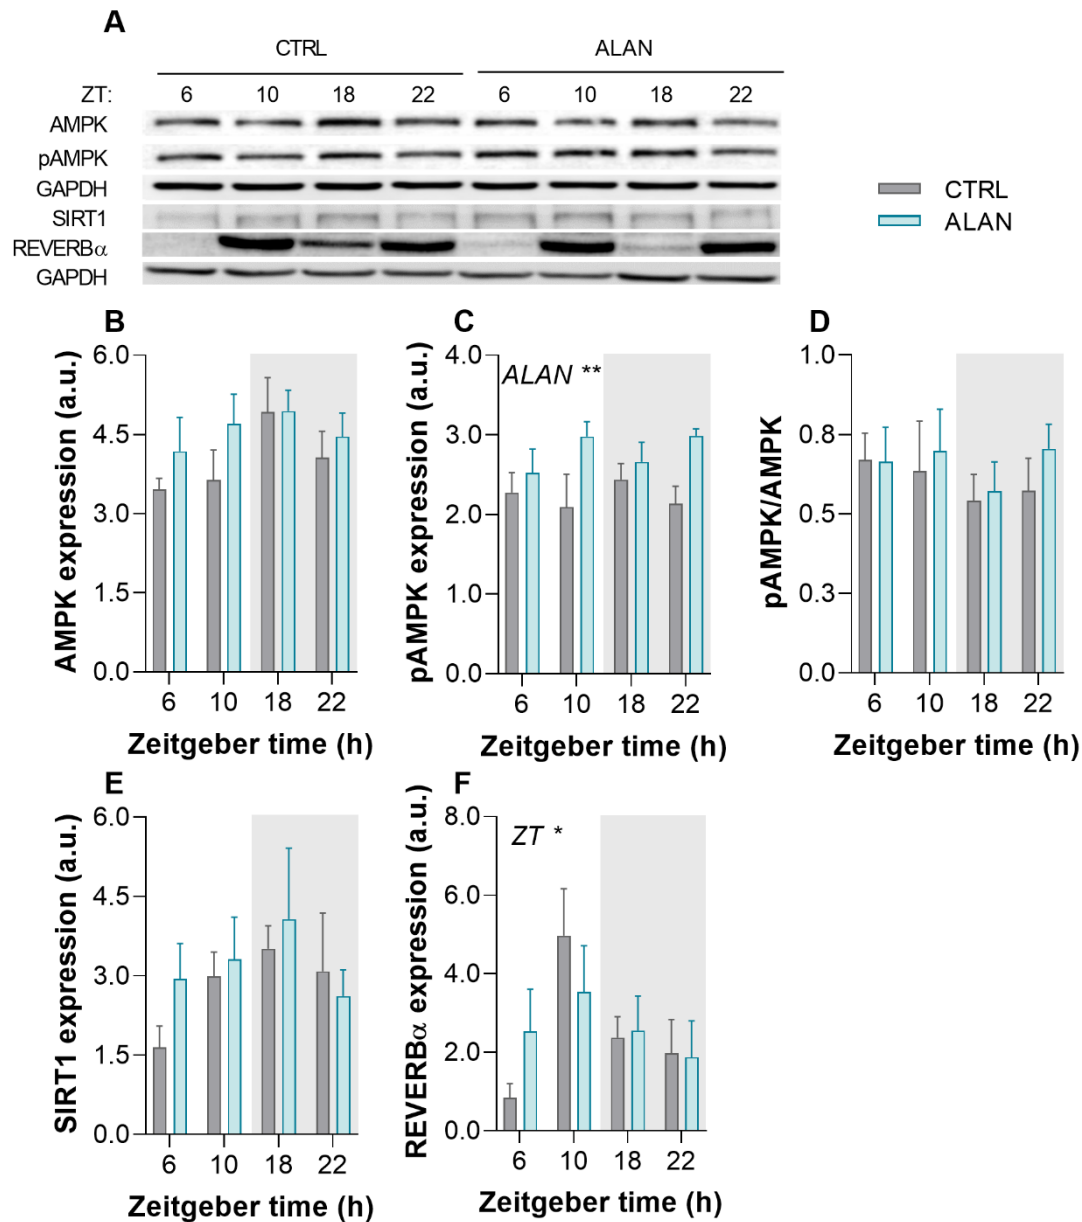

**Figure S5. Protein expression of metabolic sensors was unaffected by dim ALAN except for phosphorylated AMP-activated protein kinase.** Rats were kept either in the standard LD regime (CTRL; grey) or exposed to the dim light at night (ALAN; blue) for 2 weeks. Representative blots of AMPK, pAMPK, SIRT1 and REVERB $\alpha$  normalized to housekeeping protein GAPDH (shown below target proteins) with ZT representing zeitgeber time (A). Relative protein expression of unphosphorylated (B) and phosphorylated (C) AMPK. Ratio of pAMPK to AMPK (D). Relative protein expression of SIRT1 (E) and clock protein REVERB $\alpha$  (F). Grey area indicates the dark/dim light phase. Data represent mean  $\pm$  SEM with n=5-6 per group. Significant changes in factors (ZT, ALAN) or their interaction revealed by two-way ANOVA are specified by \*  $p < 0.05$ , \*\*  $p < 0.01$ .

## Supplementary Tables

Table S1. Primer sequences for real-time PCR.

| Gene            | Accession number | Forward primer                   | Reverse primer                   |
|-----------------|------------------|----------------------------------|----------------------------------|
| Reference genes |                  |                                  |                                  |
| <i>B2m</i>      | NM_012512.2      | 5'- TCGTGCTTGCCATTCAGAAACT -3'   | 5'- AGCAGTTGAGGAAGTTGGGCT -3'    |
| <i>Rn18s</i>    | NR_046237        | 5'- GTAACCCGTTGAACCCATT -3'      | 5'- CCATCCAATCGGTAGTAGCG -3'     |
| Target genes    |                  |                                  |                                  |
| <i>Acaca</i>    | NM_022193.1      | 5'- GCAGTCTCCCAACTCCTACG -3'     | 5'- CAGTCCACCATCACTCAGCC -3'     |
| <i>Acadm</i>    | NM_016986.2      | 5'- GGAGCCGGGACTAGGGTTTA -3'     | 5'- CTGGCAAACCTCCGAGCAAT -3'     |
| <i>Ampka2</i>   | NM_023991.1      | 5'- GACAGGCCATAAAGTGGCAG -3'     | 5'- AGTGCTGATCACTTGGTAGAGTTT -3' |
| <i>Bmal1</i>    | NM_024362.2      | 5'- CACCTTGCGGAATGTACAG -3'      | 5'- TACTTCCTTGGTCCACGGGT -3'     |
| <i>Cd36</i>     | NM_031561        | 5'- CGGCGATGAGAAAGCAGAAA -3'     | 5'- GGCTCATCCACTACTTATTTTCC -3'  |
| <i>Clock</i>    | NM_021856.2      | 5'- CTTACAGACATCTCGTTGCTC -3'    | 5'- TCTGAGGAAGCGTGTGCTAC -3'     |
| <i>Cry1</i>     | NM_198750.2      | 5'- GTGTGGAAGTCATCGTGCG -3'      | 5'- ACGTCTGATGTGATGGTGTCT -3'    |
| <i>Fasn</i>     | NM_017332.1      | 5'- GAGTCTGTCTCCCGCTTGAC -3'     | 5'- TTGCCTTGCTCACCTTCGAG -3'     |
| <i>Foxo1</i>    | NM_001191846.2   | 5'- CAGCAAATCAAGTTATGGAGGA -3'   | 5'- TATCATTGTGGGAGGAGAGTC -3'    |
| <i>Gck</i>      | NM_001270849.1   | 5'- GGAGTATGACCGGATGGTGG -3'     | 5'- GCCTCTCCGTGGAACAGAAG -3'     |
| <i>Glut2</i>    | NM_012879.2      | 5'- GAAGGATCAAAGCCATGTTGG -3'    | 5'- CCTGATACGCTTCTCCAGCA -3'     |
| <i>Glut4</i>    | NM_012751.1      | 5'- TATGTTGCGGATGCTATGGGT -3'    | 5'- AATGTCGGCCTCTGGTTTC -3'      |
| <i>Hmgcs2</i>   | NM_173094.2      | 5'- ACAAGTCCAAGGCTGTCAAG -3'     | 5'- CATAGCGACCATCCCAGTAG -3'     |
| <i>Lpl</i>      | NM_012598.2      | 5'- TCATCAACTGGTTGGAGGAAG -3'    | 5'- ACGAAATCCGCATCATCAGG -3'     |
| <i>Lxra</i>     | NM_031627.2      | 5'- TGCCTGATGTTTCTCCTGACTCTG -3' | 5'- AGTTGATTGGGGCATCTGGC -3'     |
| <i>Nampt</i>    | NM_177928.3      | 5'- AAGTTGCTGCCACCTTACCTT -3'    | 5'- TTCATTCCCTCGACAATCTCCT -3'   |
| <i>Noct</i>     | NM_138526.1      | 5'- CAGTAGCCATCCTCCATTAG -3'     | 5'- ATTTCTCTCCTCCATTGA -3'       |
| <i>Nr1d1</i>    | NM_145775.2      | 5'- TCCCACATACTTCCCACCATCA -3'   | 5'- CACTCGGCTGCTGTCTTCCAT -3'    |
| <i>Per1</i>     | NM_001034125.1   | 5'- ATCGTCCATGTGGGAGACAAG -3'    | 5'- TTGCTTTCCTTCTGGGTGTG -3'     |
| <i>Pgc1a</i>    | NM_031347.1      | 5'- AACGATGACCCCTCCTCACAC -3'    | 5'- GTTGTGGTTTGGCTTGAGCA -3'     |
| <i>Plin1</i>    | NM_001308145.1   | 5'- GTACACTATGTCCCGCTTCC -3'     | 5'- CCACCTCTGCTGGAGGATTA -3'     |
| <i>Ppara</i>    | NM_013196.1      | 5'- GACTAGCAACAATCCGCCTT -3'     | 5'- GAAGAATCGGACCTCTGCCT -3'     |
| <i>Pparg</i>    | NM_001145367.1   | 5'- TCCAAGAATACCAAAGTGCGA -3'    | 5'- CCATGAGGGAGTTTGAAGGC -3'     |
| <i>Pygl</i>     | NM_022268.1      | 5'- ATCCACTCGGACATCGTGAA -3'     | 5'- CCTGGGTTGCAGAGTAAGAG -3'     |
| <i>Scd1</i>     | NM_139192.2      | 5'- AAACCTGCAGAATGGACGAGA -3'    | 5'- GGGTCGTGGATATCTTCTCTCA -3'   |
| <i>Sirt1</i>    | NM_001372090.1   | 5'- TTATGCTCGCCTTGCTGTGG -3'     | 5'- CTGTCCGGGATATATTTCTTTGC -3'  |
| <i>Srebf1c</i>  | NM_001276707.1   | 5'- GCCATCGACTACATCCGCTT -3'     | 5'- CCAGGTCTTTCAGTGATTGCT -3'    |

Abbreviations: *Acaca* - acetyl-CoA carboxylase  $\alpha$ , *Acadm* - acyl-CoA dehydrogenase medium chain, *Ampka2* - protein kinase AMP-activated catalytic subunit  $\alpha$  2, *B2m* -  $\beta$ -2-microglobulin, *Bmal1* - brain and muscle ARNT-like 1, *Cd36* - cluster of differentiation 36 (fatty acid translocase), *Clock* - circadian locomotor output cycles kaput, *Cry1* - cryptochrome 1, *Fasn* - fatty acid synthase, *Foxo1* - forkhead box protein O1, *Gck* - glucokinase, *Glut2* - glucose transporter 2, *Glut4* - glucose transporter 4, *Hmgcs2* - 3-hydroxy-3-methylglutaryl-CoA synthase 2, *Lpl* - lipoprotein lipase, *Lxra* - liver X receptor  $\alpha$ , *Nampt* - nicotinamide phosphoribosyltransferase, *Noct* - nocturnin, *Nr1d1* - nuclear receptor subfamily 1 group d member 1 (REV-ERB $\alpha$ ), *Per1* - period 1, *Pgc1a* - peroxisome proliferator-activated receptor  $\gamma$  coactivator 1 $\alpha$ , *Plin1* - perilipin 1, *Ppara* - peroxisome proliferator-activated receptor  $\alpha$ , *Pparg* - peroxisome proliferator-activated receptor  $\gamma$ , *Pygl* - glycogen phosphorylase L (liver form), *Scd1* - stearoyl-CoA desaturase 1, *Sirt1* - sirtuin 1, *Srebf1c* - sterol regulatory element binding transcription factor 1, *Rn18s* - 18S ribosomal RNA



**Table S2. Cosinor analysis and the two-way ANOVA with repeated measures of locomotor activity and respiratory exchange ratio in rats kept in either the control regime (CTRL) or exposed to dim light at night (ALAN).**

|                                    | Cosinor analysis |                  |                   |                |                        |                                  | Two-way ANOVA with RM            |                      |                                  |
|------------------------------------|------------------|------------------|-------------------|----------------|------------------------|----------------------------------|----------------------------------|----------------------|----------------------------------|
|                                    | Mesor            | Amplitude        | Acrophase (hh:mm) | R <sup>2</sup> | F-test                 | p-value                          | ZT                               | ALAN                 | Interaction                      |
| <b>Locomotor activity (counts)</b> |                  |                  |                   |                |                        |                                  |                                  |                      |                                  |
| CTRL                               | 358.03 ± 33.33   | 263.91 ± 47.13   | 17:09 ± 00:41     | 0.62           | $F_{(2,189)} = 60.22$  | <b><math>p &lt; 0.001</math></b> | $F_{(23,322)} = 22.20$           | $F_{(1,322)} = 2.04$ | $F_{(23,322)} = 5.68$            |
| ALAN                               | 333.66 ± 25.39   | 185.36 ± 35.92** | 18:57 ± 00:44     | 0.59           | $F_{(2,189)} = 51.17$  | <b><math>p &lt; 0.001</math></b> | <b><math>p &lt; 0.001</math></b> | $p = 0.176$          | <b><math>p &lt; 0.001</math></b> |
| <b>RER</b>                         |                  |                  |                   |                |                        |                                  |                                  |                      |                                  |
| CTRL                               | 0.987 ± 0.003    | 0.048 ± 0.005    | 17:55 ± 00:23     | 0.82           | $F_{(2,189)} = 196.36$ | <b><math>p &lt; 0.001</math></b> | $F_{(23,322)} = 75.24$           | $F_{(1,322)} = 0.30$ | $F_{(23,322)} = 2.94$            |
| ALAN                               | 0.991 ± 0.003    | 0.039 ± 0.004**  | 18:28 ± 00:24     | 0.81           | $F_{(2,189)} = 174.00$ | <b><math>p &lt; 0.001</math></b> | <b><math>p &lt; 0.001</math></b> | $p = 0.594$          | <b><math>p &lt; 0.001</math></b> |

Cosinor analysis:

Rhythm parameters: mesor ± 95% confidence limits (the time series mean), amplitude ± 95% confidence limits (one-half the peak-to-trough difference) and acrophase ± 95% confidence limits (the peak of the fitted curve). R<sup>2</sup>, F- and p-values describe the significance of 24-h rhythms. A rhythm with  $p < 0.05$  is considered significant and with a trend to significance if p-value is between 0.05 and 0.1, both are indicated with bold font.

Two-way ANOVA with repeated measures:

F- and P-values of factors Zeitgeber time (ZT), ALAN and their interaction. Significant effects are indicated with bold font.

Abbreviations: RER – respiratory exchange ratio

**Table S3. The cosinor analysis of genes involved in glucose metabolism of rats kept in either the control regime (CTRL) or exposed to dim light at night (ALAN).**

|                         | Mesor        | Amplitude                | Acrophase<br>(hh:mm) | R <sup>2</sup> | F-test               | p-value             |
|-------------------------|--------------|--------------------------|----------------------|----------------|----------------------|---------------------|
| <b>PLASMA</b>           |              |                          |                      |                |                      |                     |
| <b>Insulin (ng/ml)</b>  |              |                          |                      |                |                      |                     |
| CTRL                    | -            | -                        | -                    | -              | $F_{(2,33)} = 0.05$  | p = 0.95            |
| ALAN                    | -            | -                        | -                    | -              | $F_{(2,33)} = 1.22$  | p = 0.31            |
| <b>Glucose (mmol/l)</b> |              |                          |                      |                |                      |                     |
| CTRL                    | 7.98 ± 0.18  | 0.30 ± 0.25              | 16:38 ± 03:12        | 0.38           | $F_{(2,33)} = 2.74$  | <b>p = 0.08</b>     |
| ALAN                    | -            | -                        | -                    | -              | $F_{(2,33)} = 0.61$  | p = 0.55            |
| <b>LIVER</b>            |              |                          |                      |                |                      |                     |
| <b>Glycogen (mg/g)</b>  |              |                          |                      |                |                      |                     |
| CTRL                    | 27.28 ± 1.86 | 13.07 ± 2.64             | 03:09 ± 00:46        | 0.86           | $F_{(2,32)} = 47.13$ | <b>p &lt; 0.001</b> |
| ALAN                    | 27.20 ± 1.78 | 7.96 ± 2.52**            | 04:06 ± 01:12        | 0.73           | $F_{(2,33)} = 19.21$ | <b>p &lt; 0.001</b> |
| <b>Foxo1</b>            |              |                          |                      |                |                      |                     |
| CTRL                    | 1.24 ± 0.11  | 0.23 ± 0.15              | 17:27 ± 02:25        | 0.49           | $F_{(2,32)} = 4.51$  | <b>p &lt; 0.05</b>  |
| ALAN                    | -            | -                        | -                    | -              | $F_{(2,33)} = 0.64$  | p = 0.54            |
| <b>Gck</b>              |              |                          |                      |                |                      |                     |
| CTRL                    | 0.87 ± 0.11  | 0.69 ± 0.16              | 19:24 ± 00:53        | 0.83           | $F_{(2,32)} = 35.84$ | <b>p &lt; 0.001</b> |
| ALAN                    | 1.03 ± 0.12  | 0.65 ± 0.17              | 18:40 ± 00:58        | 0.80           | $F_{(2,33)} = 29.58$ | <b>p &lt; 0.001</b> |
| <b>Glut2</b>            |              |                          |                      |                |                      |                     |
| CTRL                    | 1.23 ± 0.13  | 0.63 ± 0.19              | 14:55 ± 01:07        | 0.76           | $F_{(2,33)} = 22.17$ | <b>p &lt; 0.001</b> |
| ALAN                    | 1.42 ± 0.13  | 0.63 ± 0.18              | 12:47 ± 01:04**      | 0.77           | $F_{(2,33)} = 24.31$ | <b>p &lt; 0.001</b> |
| <b>Pygl</b>             |              |                          |                      |                |                      |                     |
| CTRL                    | 1.10 ± 0.08  | 0.13 ± 0.12              | 06:55 ± 03:19        | 0.37           | $F_{(2,33)} = 2.55$  | <b>p = 0.09</b>     |
| ALAN                    | 1.17 ± 0.08  | 0.28 ± 0.12 <sup>#</sup> | 07:56 ± 01:34        | 0.63           | $F_{(2,33)} = 10.97$ | <b>p &lt; 0.001</b> |
| <b>EPIDIDYMAL FAT</b>   |              |                          |                      |                |                      |                     |
| <b>Glut4</b>            |              |                          |                      |                |                      |                     |
| CTRL                    | -            | -                        | -                    | -              | $F_{(2,32)} = 0.82$  | p = 0.45            |
| ALAN                    | -            | -                        | -                    | -              | $F_{(2,32)} = 0.56$  | p = 0.57            |

Rhythm parameters: mesor ± 95% confidence limits (the time series mean), amplitude ± 95% confidence limits (one-half the peak-to-trough difference) and acrophase ± 95% confidence limits (the peak of the fitted curve). R<sup>2</sup>, F- and p-values describe the significance of 24-h rhythms. A rhythm with p < 0.05 is considered significant and with a trend to significance if p-value is between 0.05 and 0.1, both are indicated with bold font.

Abbreviations: *Foxo1* – forkhead box protein O1, *Gck* – glucokinase, *Glut2* – glucose transporter 2, *Glut4* – glucose transporter 4, *Pygl* – glycogen phosphorylase L (liver form)

**Table S4. The two-way ANOVA of genes involved in glucose metabolism of rats kept in either the control regime (CTRL) or exposed to dim light at night (ALAN).**

|                         | Time                                    | Regime                              | Interaction                         |
|-------------------------|-----------------------------------------|-------------------------------------|-------------------------------------|
| <b>PLASMA</b>           |                                         |                                     |                                     |
| <b>Insulin (ng/ml)</b>  | $F_{(5,60)} = 0.99$<br>$p = 0.43$       | $F_{(1,60)} = 0.06$<br>$p = 0.80$   | $F_{(5,60)} = 1.93$<br>$p = 0.10$   |
| <b>Glucose (mmol/l)</b> | $F_{(5,60)} = 1.70$<br>$p = 0.15$       | $F_{(1,60)} = 1.11$<br>$p = 0.30$   | $F_{(5,60)} = 1.08$<br>$p = 0.38$   |
| <b>LIVER</b>            |                                         |                                     |                                     |
| <b>Glycogen (mg/g)</b>  | $F_{(5,59)} = 26.25$<br>$p < 0.001$ *** | $F_{(1,59)} = 0.00$<br>$p = 0.99$   | $F_{(5,59)} = 2.58$<br>$p < 0.05$ * |
| <b><i>Foxo1</i></b>     | $F_{(5,59)} = 4.04$<br>$p < 0.01$ **    | $F_{(1,59)} = 4.06$<br>$p < 0.05$ * | $F_{(5,59)} = 0.83$<br>$p = 0.53$   |
| <b><i>Gck</i></b>       | $F_{(5,59)} = 27.79$<br>$p < 0.001$ *** | $F_{(1,59)} = 3.88$<br>$p = 0.05$ # | $F_{(5,59)} = 1.51$<br>$p = 0.20$   |
| <b><i>Glut2</i></b>     | $F_{(5,60)} = 34.61$<br>$p < 0.001$ *** | $F_{(1,60)} = 1.02$<br>$p = 0.32$   | $F_{(5,60)} = 0.89$<br>$p = 0.49$   |
| <b><i>Pygl</i></b>      | $F_{(5,60)} = 5.86$<br>$p < 0.001$ ***  | $F_{(1,60)} = 1.54$<br>$p = 0.22$   | $F_{(5,60)} = 1.16$<br>$p = 0.34$   |
| <b>EPIDIDYMAL FAT</b>   |                                         |                                     |                                     |
| <b><i>Glut4</i></b>     | $F_{(5,58)} = 4.25$<br>$p < 0.01$ **    | $F_{(1,58)} = 0.18$<br>$p = 0.68$   | $F_{(5,58)} = 1.03$<br>$p = 0.41$   |

*F*- and *P*-values of factors time, regime and their interaction. Significant effects are indicated by \*  $p < 0.05$ , \*\*  $p < 0.01$ , \*\*\*  $p < 0.001$  and # a trend to significance ( $p$ -value between 0.05 and 0.1).

Abbreviations: *Foxo1* – forkhead box protein O1, *Gck* – glucokinase, *Glut2* – glucose transporter 2, *Glut4* – glucose transporter 4, *Pygl* – glycogen phosphorylase L (liver form)

**Table S5. The cosinor analysis of genes involved in lipid metabolism of rats kept in either the control regime (CTRL) or exposed to dim light at night (ALAN).**

|                                        | Mesor       | Amplitude   | Acrophase (hh:mm) | R <sup>2</sup> | F-test               | p-value             |
|----------------------------------------|-------------|-------------|-------------------|----------------|----------------------|---------------------|
| <b>PLASMA</b>                          |             |             |                   |                |                      |                     |
| <b>Adiponectin (µg/ml)</b>             |             |             |                   |                |                      |                     |
| CTRL                                   | -           | -           | -                 | -              | $F_{(2,33)} = 0.80$  | p = 0.46            |
| ALAN                                   | 8.35 ± 0.63 | 1.07 ± 0.89 | 00:17 ± 03:01     | 0.38           | $F_{(2,33)} = 2.78$  | <b>p = 0.08</b>     |
| <b>Cholesterol (mmol/l)</b>            |             |             |                   |                |                      |                     |
| CTRL                                   | 2.57 ± 0.09 | 0.19 ± 0.13 | 01:13 ± 02:32     | 0.46           | $F_{(2,33)} = 4.35$  | <b>p &lt; 0.05</b>  |
| ALAN                                   | -           | -           | -                 | -              | $F_{(2,33)} = 1.49$  | p = 0.24            |
| <b>LDL-cholesterol (mmol/l)</b>        |             |             |                   |                |                      |                     |
| CTRL                                   | 0.71 ± 0.04 | 0.09 ± 0.06 | 04:31 ± 02:31     | 0.46           | $F_{(2,33)} = 4.40$  | <b>p &lt; 0.05</b>  |
| ALAN                                   | 0.74 ± 0.06 | 0.11 ± 0.08 | 00:17 ± 02:46*    | 0.43           | $F_{(2,33)} = 3.68$  | <b>p &lt; 0.05</b>  |
| <b>Leptin (ng/ml)</b>                  |             |             |                   |                |                      |                     |
| CTRL                                   | 3.96 ± 0.34 | 1.00 ± 0.49 | 19:34 ± 01:52     | 0.57           | $F_{(2,33)} = 8.02$  | <b>p &lt; 0.01</b>  |
| ALAN                                   | 3.80 ± 0.45 | 0.78 ± 0.64 | 17:19 ± 03:07     | 0.39           | $F_{(2,33)} = 2.89$  | <b>p = 0.07</b>     |
| <b>Triacylglycerols (mmol/l)</b>       |             |             |                   |                |                      |                     |
| CTRL                                   | 1.21 ± 0.15 | 0.31 ± 0.21 | 23:41 ± 02:37     | 0.45           | $F_{(2,33)} = 4.09$  | <b>p &lt; 0.05</b>  |
| ALAN                                   | -           | -           | -                 | -              | $F_{(2,33)} = 0.54$  | p = 0.59            |
| <b>LIVER</b>                           |             |             |                   |                |                      |                     |
| <b>Hepatic cholesterol (mg/g)</b>      |             |             |                   |                |                      |                     |
| CTRL                                   | 4.19 ± 0.12 | 0.29 ± 0.17 | 04:22 ± 02:15     | 0.50           | $F_{(2,33)} = 5.56$  | <b>p &lt; 0.01</b>  |
| ALAN                                   | 4.33 ± 0.13 | 0.25 ± 0.18 | 02:51 ± 02:49     | 0.43           | $F_{(2,32)} = 3.70$  | <b>p &lt; 0.05</b>  |
| <b>Hepatic triacylglycerols (mg/g)</b> |             |             |                   |                |                      |                     |
| CTRL                                   | -           | -           | -                 | -              | $F_{(2,33)} = 0.31$  | p = 0.74            |
| ALAN                                   | -           | -           | -                 | -              | $F_{(2,32)} = 2.43$  | p = 0.10            |
| <b>Acaca</b>                           |             |             |                   |                |                      |                     |
| CTRL                                   | 1.13 ± 0.11 | 0.52 ± 0.16 | 14:57 ± 01:09     | 0.75           | $F_{(2,33)} = 21.14$ | <b>p &lt; 0.001</b> |
| ALAN                                   | 1.36 ± 0.15 | 0.57 ± 0.21 | 13:22 ± 01:23#    | 0.69           | $F_{(2,33)} = 14.62$ | <b>p &lt; 0.001</b> |
| <b>Acadm</b>                           |             |             |                   |                |                      |                     |
| CTRL                                   | -           | -           | -                 | -              | $F_{(2,33)} = 0.04$  | p = 0.96            |
| ALAN                                   | -           | -           | -                 | -              | $F_{(2,33)} = 0.12$  | p = 0.87            |
| <b>Cd36</b>                            |             |             |                   |                |                      |                     |
| CTRL                                   | -           | -           | -                 | -              | $F_{(2,32)} = 1.10$  | p = 0.35            |
| ALAN                                   | -           | -           | -                 | -              | $F_{(2,32)} = 1.15$  | p = 0.33            |
| <b>Fasn</b>                            |             |             |                   |                |                      |                     |
| CTRL                                   | 1.00 ± 0.13 | 0.27 ± 0.18 | 16:23 ± 02:33     | 0.45           | $F_{(2,33)} = 4.29$  | <b>p &lt; 0.05</b>  |
| ALAN                                   | 1.03 ± 0.10 | 0.34 ± 0.14 | 15:54 ± 01:34     | 0.64           | $F_{(2,33)} = 11.36$ | <b>p &lt; 0.001</b> |
| <b>Hmgcs2</b>                          |             |             |                   |                |                      |                     |
| CTRL                                   | -           | -           | -                 | -              | $F_{(2,33)} = 0.63$  | p = 0.54            |
| ALAN                                   | 1.00 ± 0.04 | 0.12 ± 0.06 | 04:19 ± 01:51     | 0.58           | $F_{(2,33)} = 8.24$  | <b>p &lt; 0.01</b>  |
| <b>Lpl</b>                             |             |             |                   |                |                      |                     |
| CTRL                                   | -           | -           | -                 | -              | $F_{(2,32)} = 1.59$  | p = 0.22            |
| ALAN                                   | 0.97 ± 0.12 | 0.44 ± 0.17 | 03:11 ± 01:29     | 0.66           | $F_{(2,33)} = 12.60$ | <b>p &lt; 0.001</b> |
| <b>Scd1</b>                            |             |             |                   |                |                      |                     |
| CTRL                                   | -           | -           | -                 | -              | $F_{(2,32)} = 0.06$  | p = 0.94            |
| ALAN                                   | -           | -           | -                 | -              | $F_{(2,30)} = 0.26$  | p = 0.78            |
| <b>Srebf1c</b>                         |             |             |                   |                |                      |                     |
| CTRL                                   | -           | -           | -                 | -              | $F_{(2,33)} = 0.86$  | p = 0.43            |
| ALAN                                   | 1.14 ± 0.09 | 0.14 ± 0.12 | 10:06 ± 03:18     | 0.37           | $F_{(2,33)} = 2.59$  | <b>p = 0.09</b>     |
| <b>EPIDIDYMAL FAT</b>                  |             |             |                   |                |                      |                     |
| <b>Noct</b>                            |             |             |                   |                |                      |                     |
| CTRL                                   | 8.83 ± 1.09 | 2.93 ± 1.56 | 18:56 ± 01:59     | 0.54           | $F_{(2,32)} = 6.75$  | <b>p &lt; 0.01</b>  |
| ALAN                                   | -           | -           | -                 | -              | $F_{(2,33)} = 1.88$  | p = 0.17            |
| <b>Plin1</b>                           |             |             |                   |                |                      |                     |
| CTRL                                   | -           | -           | -                 | -              | $F_{(2,32)} = 0.09$  | p = 0.92            |
| ALAN                                   | -           | -           | -                 | -              | $F_{(2,33)} = 0.85$  | p = 0.44            |

Rhythm parameters: mesor  $\pm$  95% confidence limits (the time series mean), amplitude  $\pm$  95% confidence limits (one-half the peak-to-trough difference) and acrophase  $\pm$  95% confidence limits (the peak of the fitted curve).  $R^2$ ,  $F$ - and  $p$ -values describe the significance of 24-h rhythms. A rhythm with  $p < 0.05$  is considered significant and with a trend to significance if  $p$ -value is between 0.05 and 0.1, both are indicated with bold font.

Abbreviations: *Acaca* - acetyl-CoA carboxylase  $\alpha$ , *Acadm* - acyl-CoA dehydrogenase medium chain, *Cd36* - cluster of differentiation 36 (fatty acid translocase), *Fasn* - fatty acid synthase, *Hmgcs2* - 3-hydroxy-3-methylglutaryl-CoA synthase 2, *Lpl* - lipoprotein lipase, *Noct* - nocturnin, *Plin1* - perilipin 1, *Scd1* - stearoyl-CoA desaturase 1, *Srebp1c* - sterol regulatory element binding transcription factor 1

**Table S6. The two-way ANOVA of genes involved in lipid metabolism of rats kept in either the control regime (CTRL) or exposed to dim light at night (ALAN).**

|                                        | Time                                    | Regime                               | Interaction                          |
|----------------------------------------|-----------------------------------------|--------------------------------------|--------------------------------------|
| <b>PLASMA</b>                          |                                         |                                      |                                      |
| <b>Adiponectin (µg/ml)</b>             | $F_{(5,60)} = 1.17$<br>$p = 0.33$       | $F_{(1,60)} = 1.06$<br>$p = 0.31$    | $F_{(5,60)} = 2.31$<br>$p = 0.06 \#$ |
| <b>Cholesterol (mmol/l)</b>            | $F_{(5,60)} = 2.50$<br>$p < 0.05 *$     | $F_{(1,60)} = 4.95$<br>$p < 0.05 *$  | $F_{(5,60)} = 0.38$<br>$p = 0.86$    |
| <b>LDL-cholesterol (mmol/l)</b>        | $F_{(5,60)} = 2.42$<br>$p < 0.05 *$     | $F_{(1,60)} = 0.66$<br>$p = 0.42$    | $F_{(5,60)} = 0.84$<br>$p = 0.53$    |
| <b>Leptin (ng/ml)</b>                  | $F_{(5,60)} = 4.16$<br>$p < 0.01 **$    | $F_{(1,60)} = 0.64$<br>$p = 0.43$    | $F_{(5,60)} = 0.69$<br>$p = 0.63$    |
| <b>Triacylglycerols (mmol/l)</b>       | $F_{(5,60)} = 3.46$<br>$p < 0.01 **$    | $F_{(1,60)} = 0.24$<br>$p = 0.63$    | $F_{(5,60)} = 1.25$<br>$p = 0.30$    |
| <b>LIVER</b>                           |                                         |                                      |                                      |
| <b>Hepatic cholesterol (mg/g)</b>      | $F_{(5,59)} = 8.71$<br>$p < 0.001 ***$  | $F_{(1,59)} = 3.72$<br>$p = 0.06 \#$ | $F_{(5,59)} = 1.77$<br>$p = 0.13$    |
| <b>Hepatic triacylglycerols (mg/g)</b> | $F_{(5,59)} = 2.33$<br>$p = 0.054 \#$   | $F_{(1,59)} = 0.35$<br>$p = 0.56$    | $F_{(5,59)} = 0.90$<br>$p = 0.49$    |
| <b>Acaca</b>                           | $F_{(5,60)} = 15.75$<br>$p < 0.001 ***$ | $F_{(1,60)} = 6.42$<br>$p < 0.05 *$  | $F_{(5,60)} = 1.41$<br>$p = 0.23$    |
| <b>Acadm</b>                           | $F_{(5,60)} = 0.49$<br>$p = 0.780$      | $F_{(1,60)} = 0.90$<br>$p = 0.35$    | $F_{(5,60)} = 0.23$<br>$p = 0.95$    |
| <b>Cd36</b>                            | $F_{(5,58)} = 2.00$<br>$p = 0.092 \#$   | $F_{(1,58)} = 0.09$<br>$p = 0.77$    | $F_{(5,58)} = 1.56$<br>$p = 0.19$    |
| <b>Fasn</b>                            | $F_{(5,60)} = 7.68$<br>$p < 0.001 ***$  | $F_{(1,60)} = 0.15$<br>$p = 0.70$    | $F_{(5,60)} = 1.03$<br>$p = 0.41$    |
| <b>Lpl</b>                             | $F_{(5,59)} = 5.01$<br>$p < 0.001 ***$  | $F_{(1,59)} = 0.05$<br>$p = 0.83$    | $F_{(5,59)} = 1.76$<br>$p = 0.14$    |
| <b>Hmgcs2</b>                          | $F_{(5,60)} = 2.12$<br>$p = 0.075 \#$   | $F_{(1,60)} = 2.18$<br>$p = 0.15$    | $F_{(5,60)} = 0.93$<br>$p = 0.47$    |
| <b>Scd1</b>                            | $F_{(5,56)} = 0.90$<br>$p = 0.488$      | $F_{(1,56)} = 1.43$<br>$p = 0.24$    | $F_{(5,56)} = 0.23$<br>$p = 0.81$    |
| <b>Srebflc</b>                         | $F_{(5,60)} = 1.30$<br>$p = 0.277$      | $F_{(1,60)} = 1.03$<br>$p = 0.32$    | $F_{(5,60)} = 1.60$<br>$p = 0.17$    |
| <b>EPIDIDYMAL FAT</b>                  |                                         |                                      |                                      |
| <b>Noct</b>                            | $F_{(5,59)} = 10.53$<br>$p < 0.001 ***$ | $F_{(1,59)} = 0.01$<br>$p = 0.91$    | $F_{(5,59)} = 1.81$<br>$p = 0.12$    |
| <b>Plin1</b>                           | $F_{(5,59)} = 4.62$<br>$p < 0.01 **$    | $F_{(1,59)} = 0.01$<br>$p = 0.93$    | $F_{(5,59)} = 0.46$<br>$p = 0.81$    |

*F*- and *P*-values of factors time, regime and their interaction. Significant effects are indicated by \*  $p < 0.05$ , \*\*  $p < 0.01$ , \*\*\*  $p < 0.001$  and # a trend to significance ( $p$ -value between 0.05 and 0.1).

Abbreviations: *Acaca* - acetyl-CoA carboxylase  $\alpha$ , *Acadm* - acyl-CoA dehydrogenase medium chain, *Cd36* - cluster of differentiation 36 (fatty acid translocase), *Fasn* – fatty acid synthase, *Hmgcs2* - 3-hydroxy-3-methylglutaryl-CoA synthase 2, *Lpl* – lipoprotein lipase, *Noct* – nocturnin, *Plin1* – perilipin 1, *Scd1* - stearoyl-CoA desaturase 1, *Srebflc* - sterol regulatory element binding transcription factor 1

**Table S7. The cosinor analysis of metabolic sensors in rats kept in either the control regime (CTRL) or exposed to dim light at night (ALAN).**

|                       | Mesor       | Amplitude   | Acrophase (hh:mm) | R <sup>2</sup> | F-test                             | p-value             |
|-----------------------|-------------|-------------|-------------------|----------------|------------------------------------|---------------------|
| <b>LIVER</b>          |             |             |                   |                |                                    |                     |
| <b>Ampka2</b>         |             |             |                   |                |                                    |                     |
| CTRL                  | 0.93 ± 0.07 | 0.24 ± 0.10 | 13:36 ± 01:34     | 0.64           | <i>F</i> <sub>(2,33)</sub> = 11.45 | <b>p &lt; 0.001</b> |
| ALAN                  | 0.94 ± 0.05 | 0.23 ± 0.07 | 14:23 ± 01:07     | 0.76           | <i>F</i> <sub>(2,33)</sub> = 22.67 | <b>p &lt; 0.001</b> |
| <b>Nampt</b>          |             |             |                   |                |                                    |                     |
| CTRL                  | 1.26 ± 0.17 | 1.30 ± 0.24 | 16:02 ± 00:42     | 0.88           | <i>F</i> <sub>(2,33)</sub> = 55.96 | <b>p &lt; 0.001</b> |
| ALAN                  | 1.18 ± 0.13 | 1.06 ± 0.18 | 15:04 ± 00:40#    | 0.89           | <i>F</i> <sub>(2,33)</sub> = 63.96 | <b>p &lt; 0.001</b> |
| <b>Lxra</b>           |             |             |                   |                |                                    |                     |
| CTRL                  | 1.00 ± 0.06 | 0.15 ± 0.09 | 20:46 ± 02:11     | 0.51           | <i>F</i> <sub>(2,33)</sub> = 5.83  | <b>p &lt; 0.01</b>  |
| ALAN                  | -           | -           | -                 | -              | <i>F</i> <sub>(2,33)</sub> = 2.52  | p = 0.10            |
| <b>Ppara</b>          |             |             |                   |                |                                    |                     |
| CTRL                  | 1.15 ± 0.11 | 0.55 ± 0.15 | 13:54 ± 01:02     | 0.78           | <i>F</i> <sub>(2,33)</sub> = 25.99 | <b>p &lt; 0.001</b> |
| ALAN                  | 1.14 ± 0.09 | 0.52 ± 0.12 | 11:39 ± 00:54**   | 0.82           | <i>F</i> <sub>(2,33)</sub> = 34.64 | <b>p &lt; 0.001</b> |
| <b>Pparg</b>          |             |             |                   |                |                                    |                     |
| CTRL                  | 0.97 ± 0.10 | 0.25 ± 0.14 | 06:58 ± 02:07     | 0.55           | <i>F</i> <sub>(2,31)</sub> = 6.56  | <b>p &lt; 0.01</b>  |
| ALAN                  | 1.04 ± 0.09 | 0.17 ± 0.13 | 09:17 ± 02:59     | 0.40           | <i>F</i> <sub>(2,33)</sub> = 3.13  | <b>p = 0.06</b>     |
| <b>Pgc1a</b>          |             |             |                   |                |                                    |                     |
| CTRL                  | 1.27 ± 0.13 | 0.33 ± 0.19 | 15:21 ± 02:13     | 0.51           | <i>F</i> <sub>(2,33)</sub> = 5.71  | <b>p &lt; 0.01</b>  |
| ALAN                  | 1.43 ± 0.17 | 0.44 ± 0.24 | 10:49 ± 02:06**   | 0.53           | <i>F</i> <sub>(2,33)</sub> = 6.34  | <b>p &lt; 0.01</b>  |
| <b>Sirt1</b>          |             |             |                   |                |                                    |                     |
| CTRL                  | 1.05 ± 0.06 | 0.14 ± 0.09 | 11:37 ± 02:28     | 0.47           | <i>F</i> <sub>(2,33)</sub> = 4.62  | <b>p &lt; 0.05</b>  |
| ALAN                  | -           | -           | -                 | -              | <i>F</i> <sub>(2,33)</sub> = 0.07  | p = 0.93            |
| <b>EPIDIDYMAL FAT</b> |             |             |                   |                |                                    |                     |
| <b>Nampt</b>          |             |             |                   |                |                                    |                     |
| CTRL                  | 5.60 ± 0.69 | 2.70 ± 0.99 | 16:54 ± 01:22     | 0.69           | <i>F</i> <sub>(2,32)</sub> = 14.40 | <b>p &lt; 0.001</b> |
| ALAN                  | 5.33 ± 0.65 | 1.71 ± 0.92 | 15:29 ± 02:03     | 0.54           | <i>F</i> <sub>(2,33)</sub> = 6.68  | <b>p &lt; 0.01</b>  |
| <b>Ppara</b>          |             |             |                   |                |                                    |                     |
| CTRL                  | 8.81 ± 0.98 | 1.98 ± 1.40 | 16:32 ± 02:39     | 0.44           | <i>F</i> <sub>(2,32)</sub> = 3.84  | <b>p &lt; 0.05</b>  |
| ALAN                  | -           | -           | -                 | -              | <i>F</i> <sub>(2,33)</sub> = 0.48  | p = 0.62            |
| <b>Pparg</b>          |             |             |                   |                |                                    |                     |
| CTRL                  | 8.73 ± 0.87 | 1.99 ± 1.22 | 15:15 ± 02:24     | 0.50           | <i>F</i> <sub>(2,31)</sub> = 5.13  | <b>p &lt; 0.05</b>  |
| ALAN                  | 8.37 ± 0.81 | 1.62 ± 1.15 | 12:53 ± 02:42     | 0.43           | <i>F</i> <sub>(2,33)</sub> = 3.82  | <b>p &lt; 0.05</b>  |
| <b>Pgc1a</b>          |             |             |                   |                |                                    |                     |
| CTRL                  | -           | -           | -                 | -              | <i>F</i> <sub>(2,32)</sub> = 0.11  | p = 0.89            |
| ALAN                  | -           | -           | -                 | -              | <i>F</i> <sub>(2,33)</sub> = 1.01  | p = 0.38            |
| <b>Sirt1</b>          |             |             |                   |                |                                    |                     |
| CTRL                  | 8.34 ± 0.81 | 1.33 ± 1.15 | 15:44 ± 03:17     | 0.37           | <i>F</i> <sub>(2,32)</sub> = 2.55  | <b>p = 0.09</b>     |
| ALAN                  | -           | -           | -                 | -              | <i>F</i> <sub>(2,33)</sub> = 0.80  | p = 0.46            |

Rhythm parameters: mesor ± 95% confidence limits (the time series mean), amplitude ± 95% confidence limits (one-half the peak-to-trough difference) and acrophase ± 95% confidence limits (the peak of the fitted curve). R<sup>2</sup>, F- and p-values describe the significance of 24-h rhythms. A rhythm with p < 0.05 is considered significant and with a trend to significance if p-value is between 0.05 and 0.1, both are indicated with bold font.

Abbreviations: *Ampka2* - protein kinase AMP-activated catalytic subunit α 2, *Lxra* – liver X receptor α, *Nampt* - nicotinamide phosphoribosyltransferase, *Pgc1a* - peroxisome proliferator-activated receptor γ coactivator 1α, *Ppara* - peroxisome proliferator-activated receptor α, *Pparg* - peroxisome proliferator-activated receptor γ, *Sirt1* – sirtuin 1

**Table S8. The two-way ANOVA of metabolic sensors in rats kept in either the control regime (CTRL) or exposed to dim light at night (ALAN).**

|                       | Time                                    | Regime                              | Interaction                            |
|-----------------------|-----------------------------------------|-------------------------------------|----------------------------------------|
| <b>LIVER</b>          |                                         |                                     |                                        |
| <b><i>Ampka2</i></b>  | $F_{(5,60)} = 11.83$<br>$p < 0.001$ *** | $F_{(1,60)} = 0.05$<br>$p = 0.82$   | $F_{(5,60)} = 0.38$<br>$p = 0.86$      |
| <b><i>Lxra</i></b>    | $F_{(5,60)} = 3.62$<br>$p < 0.01$ **    | $F_{(1,60)} = 0.01$<br>$p = 0.91$   | $F_{(5,60)} = 2.07$<br>$p = 0.08$ #    |
| <b><i>Nampt</i></b>   | $F_{(5,60)} = 85.68$<br>$p < 0.001$ *** | $F_{(1,60)} = 0.95$<br>$p = 0.33$   | $F_{(5,60)} = 5.25$<br>$p < 0.001$ *** |
| <b><i>Ppara</i></b>   | $F_{(5,60)} = 23.50$<br>$p < 0.001$ *** | $F_{(1,60)} = 0.05$<br>$p = 0.91$   | $F_{(5,60)} = 2.61$<br>$p < 0.05$ *    |
| <b><i>Pparg</i></b>   | $F_{(5,58)} = 4.94$<br>$p < 0.001$ ***  | $F_{(1,58)} = 0.92$<br>$p = 0.34$   | $F_{(5,58)} = 0.78$<br>$p = 0.57$      |
| <b><i>Pgc1α</i></b>   | $F_{(5,60)} = 3.82$<br>$p < 0.01$ **    | $F_{(1,60)} = 2.16$<br>$p = 0.15$   | $F_{(5,60)} = 2.49$<br>$p < 0.05$ *    |
| <b><i>Sirt1</i></b>   | $F_{(5,60)} = 1.06$<br>$p = 0.393$      | $F_{(1,60)} = 1.67$<br>$p = 0.20$   | $F_{(5,60)} = 0.85$<br>$p = 0.52$      |
| <b>EPIDIDYMAL FAT</b> |                                         |                                     |                                        |
| <b><i>Nampt</i></b>   | $F_{(5,59)} = 13.36$<br>$p < 0.001$ *** | $F_{(1,59)} = 0.43$<br>$p = 0.51$   | $F_{(5,59)} = 2.18$<br>$p = 0.07$ #    |
| <b><i>Ppara</i></b>   | $F_{(5,59)} = 4.98$<br>$p < 0.001$ ***  | $F_{(1,59)} = 0.29$<br>$p = 0.59$   | $F_{(5,59)} = 1.18$<br>$p = 0.33$      |
| <b><i>Pparg</i></b>   | $F_{(5,58)} = 6.14$<br>$p < 0.001$ ***  | $F_{(1,58)} = 0.52$<br>$p = 0.47$   | $F_{(5,58)} = 0.63$<br>$p = 0.68$      |
| <b><i>Pgc1α</i></b>   | $F_{(5,59)} = 2.31$<br>$p = 0.06$ #     | $F_{(1,59)} = 4.74$<br>$p < 0.05$ * | $F_{(5,59)} = 1.93$<br>$p = 0.10$      |
| <b><i>Sirt1</i></b>   | $F_{(5,59)} = 7.20$<br>$p < 0.001$ ***  | $F_{(1,59)} = 0.01$<br>$p = 0.93$   | $F_{(5,59)} = 1.17$<br>$p = 0.33$      |

*F*- and *P*-values of factors time, regime and their interaction. Significant effects are indicated by \*  $p < 0.05$ , \*\*  $p < 0.01$ , \*\*\*  $p < 0.001$  and # a trend to significance ( $p$ -value between 0.05 and 0.1). Abbreviations: *Ampka2* - protein kinase AMP-activated catalytic subunit  $\alpha$  2, *Lxra* – liver X receptor  $\alpha$ , *Nampt* - nicotinamide phosphoribosyltransferase, *Pgc1 $\alpha$*  - peroxisome proliferator-activated receptor  $\gamma$  coactivator 1 $\alpha$ , *Ppara* - peroxisome proliferator-activated receptor  $\alpha$ , *Pparg* - peroxisome proliferator-activated receptor  $\gamma$ , *Sirt1* – sirtuin 1



**Table S9. The cosinor analysis of clock genes in rats kept in either the control regime (CTRL) or exposed to dim light at night (ALAN).**

|                       | Mesor       | Amplitude    | Acrophase (hh:mm) | R <sup>2</sup> | F-test                              | p-value   |
|-----------------------|-------------|--------------|-------------------|----------------|-------------------------------------|-----------|
| <b>LIVER</b>          |             |              |                   |                |                                     |           |
| <b><i>Bmal1</i></b>   |             |              |                   |                |                                     |           |
| CTRL                  | 0.99 ± 0.16 | 1.10 ± 0.23  | 01:17 ± 00:48     | 0.86           | <i>F</i> <sub>(2,32)</sub> = 45.33  | p < 0.001 |
| ALAN                  | 0.96 ± 0.12 | 1.20 ± 0.17  | 23:46 ± 00:33**   | 0.93           | <i>F</i> <sub>(2,32)</sub> = 98.27  | p < 0.001 |
| <b><i>Clock</i></b>   |             |              |                   |                |                                     |           |
| CTRL                  | 1.23 ± 0.09 | 0.47 ± 0.13  | 00:41 ± 01:02     | 0.78           | <i>F</i> <sub>(2,33)</sub> = 26.26  | p < 0.001 |
| ALAN                  | 1.20 ± 0.07 | 0.46 ± 0.09  | 23:53 ± 00:45     | 0.86           | <i>F</i> <sub>(2,33)</sub> = 48.77  | p < 0.001 |
| <b><i>Cry1</i></b>    |             |              |                   |                |                                     |           |
| CTRL                  | 1.12 ± 0.10 | 0.93 ± 0.14  | 20:22 ± 00:34     | 0.92           | <i>F</i> <sub>(2,32)</sub> = 84.26  | p < 0.001 |
| ALAN                  | 1.05 ± 0.11 | 0.91 ± 0.15  | 20:01 ± 00:38     | 0.90           | <i>F</i> <sub>(2,33)</sub> = 68.22  | p < 0.001 |
| <b><i>Nr1d1</i></b>   |             |              |                   |                |                                     |           |
| CTRL                  | 0.90 ± 0.23 | 1.43 ± 0.33  | 09:40 ± 00:53     | 0.83           | <i>F</i> <sub>(2,33)</sub> = 36.43  | p < 0.001 |
| ALAN                  | 1.12 ± 0.19 | 1.61 ± 0.27  | 08:37 ± 00:39#    | 0.90           | <i>F</i> <sub>(2,33)</sub> = 67.08  | p < 0.001 |
| <b><i>Per1</i></b>    |             |              |                   |                |                                     |           |
| CTRL                  | 1.43 ± 0.31 | 1.85 ± 0.44  | 14:29 ± 00:55     | 0.82           | <i>F</i> <sub>(2,33)</sub> = 33.51  | p < 0.001 |
| ALAN                  | 1.31 ± 0.25 | 1.58 ± 0.35  | 13:57 ± 00:51     | 0.84           | <i>F</i> <sub>(2,33)</sub> = 38.39  | p < 0.001 |
| <b>EPIDIDYMAL FAT</b> |             |              |                   |                |                                     |           |
| <b><i>Bmal1</i></b>   |             |              |                   |                |                                     |           |
| CTRL                  | 8.52 ± 0.93 | 9.14 ± 1.30  | 00:21 ± 00:34     | 0.92           | <i>F</i> <sub>(2,32)</sub> = 94.57  | p < 0.001 |
| ALAN                  | 7.54 ± 0.93 | 8.00 ± 1.09  | 23:23 ± 00:31*    | 0.93           | <i>F</i> <sub>(2,33)</sub> = 101.80 | p < 0.001 |
| <b><i>Clock</i></b>   |             |              |                   |                |                                     |           |
| CTRL                  | 8.78 ± 0.89 | 1.83 ± 1.24  | 00:36 ± 02:40     | 0.45           | <i>F</i> <sub>(2,32)</sub> = 4.17   | p < 0.05  |
| ALAN                  | 9.17 ± 0.95 | 1.90 ± 1.34  | 00:25 ± 02:43     | 0.43           | <i>F</i> <sub>(2,33)</sub> = 3.82   | p < 0.05  |
| <b><i>Cry1</i></b>    |             |              |                   |                |                                     |           |
| CTRL                  | 8.37 ± 0.80 | 6.64 ± 1.14  | 19:35 ± 00:39     | 0.90           | <i>F</i> <sub>(2,32)</sub> = 65.27  | p < 0.001 |
| ALAN                  | 7.78 ± 0.82 | 5.92 ± 1.16  | 19:50 ± 00:45     | 0.87           | <i>F</i> <sub>(2,33)</sub> = 49.94  | p < 0.001 |
| <b><i>Nr1d1</i></b>   |             |              |                   |                |                                     |           |
| CTRL                  | 9.50 ± 2.06 | 13.13 ± 2.90 | 09:31 ± 00:51     | 0.84           | <i>F</i> <sub>(2,32)</sub> = 39.31  | p < 0.001 |
| ALAN                  | 9.93 ± 1.86 | 12.82 ± 2.63 | 08:36 ± 00:47     | 0.86           | <i>F</i> <sub>(2,32)</sub> = 45.54  | p < 0.001 |
| <b><i>Per1</i></b>    |             |              |                   |                |                                     |           |
| CTRL                  | 5.80 ± 0.92 | 4.87 ± 1.30  | 14:25 ± 01:02     | 0.79           | <i>F</i> <sub>(2,32)</sub> = 27.00  | p < 0.001 |
| ALAN                  | 4.65 ± 0.69 | 2.84 ± 0.97* | 11:58 ± 01:18**   | 0.71           | <i>F</i> <sub>(2,33)</sub> = 16.40  | p < 0.001 |

Rhythm parameters: mesor ± 95% confidence limits (the time series mean), amplitude ± 95% confidence limits (one-half the peak-to-trough difference) and acrophase ± 95% confidence limits (the peak of the fitted curve). R<sup>2</sup>, *F*- and *p*-values describe the significance of 24-h rhythms. A rhythm with *p* < 0.05 is considered significant and with a trend to significance if *p*-value is between 0.05 and 0.1, both are indicated with bold font.

Abbreviations: *Bmal1* - brain and muscle ARNT-like 1, *Clock* - circadian locomotor output cycles kaput, *Cry1* – cryptochrome 1, *Per1* – period 1, *Nr1d1* - nuclear receptor subfamily 1 group d member 1 or REV-ERBα

**Table S10. The two-way ANOVA of clock genes in rats kept in either the control regime (CTRL) or exposed to dim light at night (ALAN).**

|                       | Time                                     | Regime                               | Interaction                             |
|-----------------------|------------------------------------------|--------------------------------------|-----------------------------------------|
| <b>LIVER</b>          |                                          |                                      |                                         |
| <b><i>Bmal1</i></b>   | $F_{(5,58)} = 66.78$<br>$p < 0.001$ ***  | $F_{(1,58)} = 0.08$<br>$p = 0.78$    | $F_{(5,58)} = 7.86$<br>$p < 0.001$ ***  |
| <b><i>Clock</i></b>   | $F_{(5,60)} = 40.07$<br>$p < 0.001$ ***  | $F_{(1,60)} = 0.34$<br>$p = 0.56$    | $F_{(5,60)} = 0.80$<br>$p = 0.55$       |
| <b><i>Cry1</i></b>    | $F_{(5,59)} = 62.18$<br>$p < 0.001$ ***  | $F_{(1,59)} = 0.86$<br>$p = 0.36$    | $F_{(5,59)} = 0.69$<br>$p = 0.63$       |
| <b><i>Nr1d1</i></b>   | $F_{(5,60)} = 151.73$<br>$p < 0.001$ *** | $F_{(1,60)} = 7.08$<br>$p < 0.01$ ** | $F_{(5,60)} = 15.05$<br>$p < 0.001$ *** |
| <b><i>Per1</i></b>    | $F_{(5,60)} = 117.59$<br>$p < 0.001$ *** | $F_{(1,60)} = 1.07$<br>$p = 0.30$    | $F_{(5,60)} = 1.59$<br>$p = 0.18$       |
| <b>EPIDIDYMAL FAT</b> |                                          |                                      |                                         |
| <b><i>Bmal1</i></b>   | $F_{(5,59)} = 195.07$<br>$p < 0.001$ *** | $F_{(1,59)} = 1.80$<br>$p = 0.19$    | $F_{(5,59)} = 3.08$<br>$p < 0.05$ *     |
| <b><i>Clock</i></b>   | $F_{(5,59)} = 9.76$<br>$p < 0.001$ ***   | $F_{(1,59)} = 0.54$<br>$p = 0.47$    | $F_{(5,59)} = 0.18$<br>$p = 0.97$       |
| <b><i>Cry1</i></b>    | $F_{(5,59)} = 53.57$<br>$p < 0.001$ ***  | $F_{(1,59)} = 1.11$<br>$p = 0.30$    | $F_{(5,59)} = 0.67$<br>$p = 0.65$       |
| <b><i>Nr1d1</i></b>   | $F_{(5,59)} = 63.58$<br>$p < 0.001$ ***  | $F_{(1,59)} = 0.17$<br>$p = 0.68$    | $F_{(5,59)} = 1.41$<br>$p = 0.23$       |
| <b><i>Per1</i></b>    | $F_{(5,59)} = 16.00$<br>$p < 0.001$ ***  | $F_{(1,59)} = 3.85$<br>$p = 0.05$ #  | $F_{(5,59)} = 2.98$<br>$p < 0.05$       |

*F*- and *P*-values of factors time, regime and their interaction. Significant effects are indicated by \*  $p < 0.05$ , \*\*  $p < 0.01$ , \*\*\*  $p < 0.001$  and # a trend to significance ( $p$ -value between 0.05 and 0.1).

Abbreviations: *Bmal1* - brain and muscle ARNT-like 1, *Clock* - circadian locomotor output cycles kaput, *Cry1* – cryptochrome 1, *Per1* – period 1, *Nr1d1* - nuclear receptor subfamily 1 group d member 1 or REV-ERB $\alpha$

## References

Stenvers, D.J., Van Dorp, R., Foppen, E., Mendoza, J., Opperhuizen, A.-L., Fliers, E., et al. (2016). Dim light at night disturbs the daily sleep-wake cycle in the rat. *Sci Rep* 6, 35662. doi: 10.1038/srep35662.
